# Supplementary material for: Treatment with PCSK9 Inhibitor Evolocumab Improves Vascular Oxidative Stress and Arterial Stiffness in Hypercholesterolemic Patients with High Cardiovascular Risk
Source: MDPI journal article supplement (doi:10.3390/antiox12030578), 2023-02-25
Supplement: s1 [file s1]

Supplementary Materials

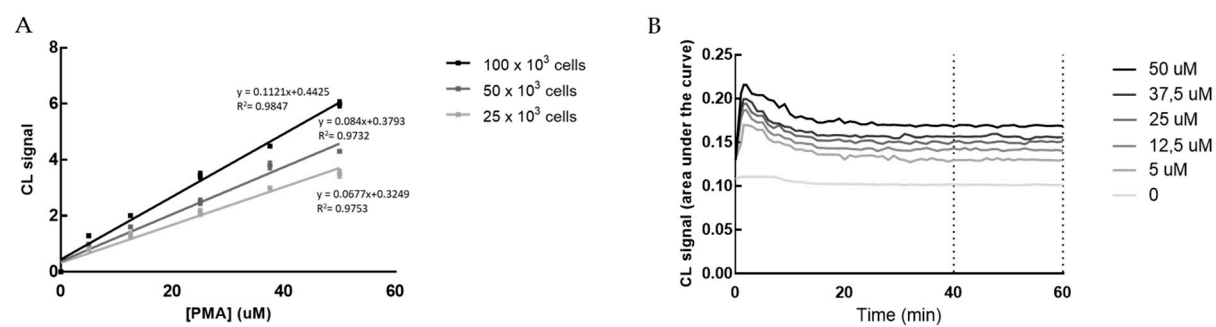

**Figure S1.**(A) Dose-response graph showing the correlation between the CL signal and the concentration of PMA (range 0 – 25  $\mu\text{M}$ ) in freshly isolated PBMCs from a healthy volunteer ( $25 - 100 \times 10^3$  cells). Each point represents the mean  $\pm$  SD of three independent measurements. (B) Chemiluminescence kinetic profiles obtained for PBMCs isolated from a healthy volunteer in the presence of different concentrations of PMA.

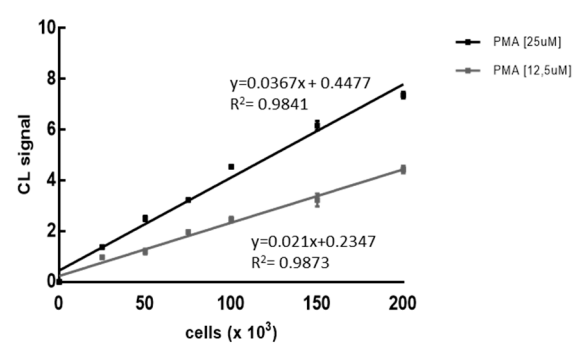

**Figure S2.** Dose-response curves showing the correlation between the CL signal and the concentration of PMBCs from a healthy volunteer (range 0 – 200  $\times 10^3$  cells) in the presence of PMA (12.5 and 25  $\mu\text{M}$ , respectively). Each point represents the mean  $\pm$  SD of three independent measurements.
